# Supplementary material for: Pd embedded in chitosan microspheres as tunable soft-materials for Sonogashira cross-coupling in water–ethanol mixture
Source: Royal Society of Chemistry journal article supplement (doi:10.1039/c4gc02175d), 2015-01-01

# **Pd-Chitosan-based Microspheres as Tunable Soft-Materials for Sonogashira Cross-Coupling in Water-Ethanol Mixture**

**S. Frindy, A. Primo, M. Lahcini, M. Bousmina, H. Garcia, A. El Kadib.**

## **Supplementary information**

**S1. Experimental section.**

**S2. Digital photos of the microspheres.**

**S3. DRIFT analysis.**

**S4. CP MAS NMR analysis.**

**S5. SEM analysis**

**S6. TEM analysis**

**S7. XPS analysis**

**S8. Catalysis.**

**S9. NMR spectra of some substrates.**

## **S1. Experimental section.**

### ***General Remarks***

Commercially available reagents and solvents were purchased from Across and Aldrich and used without further purification. Chitosan of medium molecular weight and deacetylation degree of 80% was purchased from Sigma Aldrich and was used as support material.

### ***Characterization techniques***

Scanning electron microscopy (SEM) images were acquired by using a JEOL JSM 6300 apparatus. Transmission electron microscopy (TEM) images were taken in a Philips CM 300 FEG system with an operating voltage of 100 kV. DRIFT spectra were monitored using NICOLET iS10 spectrometer. XPS spectra were recorded on a SPECS spectrometer equipped with a Phoibos 150 9MCD detector using a nonmonochromatic X-ray source (Al and Mg) operating at 200 W. The samples were evacuated in the prechamber of the spectrometer at  $1 \times 10^{-9}$  mbar. Some of the samples have been activated in situ in N<sub>2</sub> flow at 450 °C for 3 h followed by evacuation at  $10^{-8}$  mbar. The measured intensity ratios of components were obtained from the area of the corresponding peaks after nonlinear Shirley-type background subtraction and corrected by the transmission function of the spectrometer. ICP optical emission spectrometer were acquired by using a 715-ES Varian apparatus. BET analysis were monitored using micrometric ASP2420 instrument. Solid-state <sup>13</sup>C MAS NMR experiments were performed on a Varian VNMRs 400 MHz solid spectrometer fitted with a 9.4 T magnetic field using a twochannelprobe with 7.5 mm ZrO<sub>2</sub> rotors with 3 and 5 kHz spinning rates.

### **S1a. Preparation of chitosan microspheres CS**

Chitosan gel microspheres were prepared as follow: aqueous solution of chitosan are obtained by dissolving 500 mg of chitosan in 100 mL of 1% (v/v) acetic acid solution (excess of acetic acid to completely dissolve the polymer). Total dissolution was obtained by stirring for 3 h at

room temperature. This solution was added dropwise through a 0.8 mm syringe needle into a NaOH solution (0.1 M). The resulting chitosan microspheres were stored in the alkaline solution for 2 h, filtered and washed until a neutral pH solution. The beads matured under these conditions are called “hydrogel”. Alcogel microspheres were obtained by their immersing in increased solution ration of ethanol: water (respectively: 10/90; 30/70; 50/50; 70/30; 90/10) until 100% ethanol solution.

#### **S1b. Preparation of cross-linked chitosan microspheres CS-Glu**

Chemical cross-linking of chitosan microspheres using glutaraldehyde (GLA) as a cross-linking agent was carried out according to the procedure described in reference 15. Chitosan microspheres reacted with glutaraldehyde solution (4% v/v) which corresponds to 1:1 ratio of amine groups of chitosan and aldehyde functions of the cross-linking agent. The reaction was left for 72 h at room temperature. The cross-linked chitosan microspheres were intensively washed with distilled water to eliminate any adsorbed chemicals, filtered and exchanged with ethanol: water solutions until 100% ethanol and then stored in ethanol.

#### **S1c. Preparation of thiolated chitosan microspheres CS-SH**

The introduction of thiolated arms to the chitosan microspheres has been carried out following the procedure described in reference 16. Under nitrogen, a solution containing 7.25 mmol of alcogel microspheres chitosan, a large excess of  $\alpha$ -thiobutyrolactone (36.25 mmol) and toluene ( $V = 3.5$  mL) was heated at 80°C during 96 h. The microspheres were copiously washed with the used solvent in order to remove all physisorbed chemicals.

#### **S1d. Immobilization of palladium onto chitosan and modified chitosan microspheres**

To 0.203 g of Pd (OAc)<sub>2</sub> in 20 mL ethanol was added 625 mg of chitosan microspheres (3.625 mmol). The resulting mixture was stirred for 2 h at room temperature under inert atmosphere. The color of the chitosan microspheres immediately turned from white into orange or black

depending on the microspheres used (**CS**, **CS-Glu** or **CS-SH**). The resulting supported microspheres were then filtered and washed several times with absolute ethanol. The alcogel materials were then used directly in catalysis (alcogel catalysts) or firstly dried under supercritical conditions (see below) to yield catalytic aerogel microspheres.

#### **S1f. CO<sub>2</sub>-alcogel drying**

Aerogel microspheres were obtained by CO<sub>2</sub> supercritical drying of the corresponding modified alcogels. This method consists in the extraction of the solvent above the critical point. Ethanol was replaced by liquid CO<sub>2</sub> and the microspheres were dried under supercritical CO<sub>2</sub> conditions (73.8 bar and 31.5 °C) in a Polaron 3100 apparatus.

## S2. Digital photos of the microspheres

### S2a. Native microspheres.

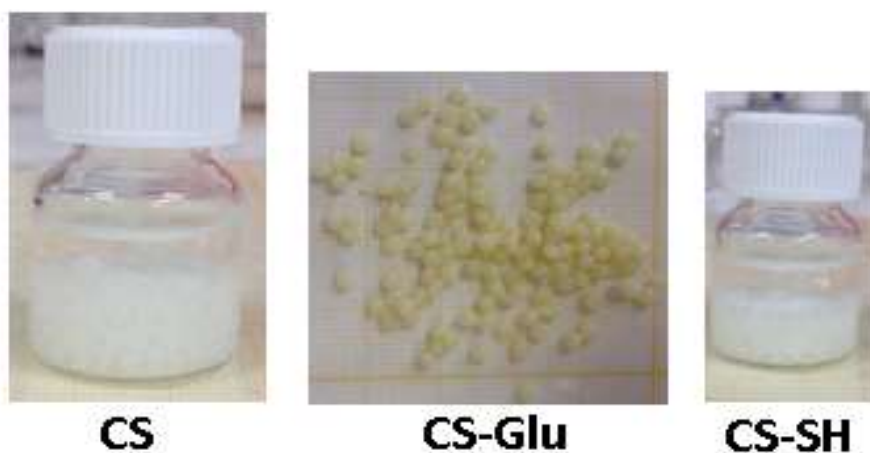

**CS**, **CS-Glu** and **CS-SH** alcogel microspheres. While **CS** and **CS-SH** appear with White color, reticulated chitosan beads (**CS-Glu**) turned yellow upon reacting with glutaradeyhde as a result of C=N formation.

### S2b. digital photos of Pd supported microspheres.

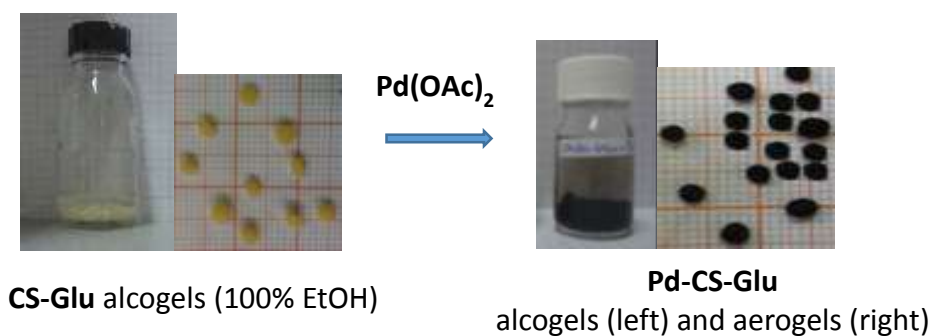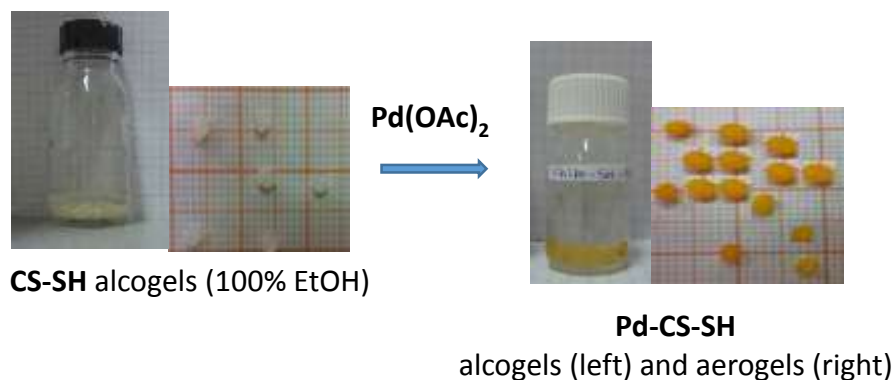

### S3. DRIFT analysis.

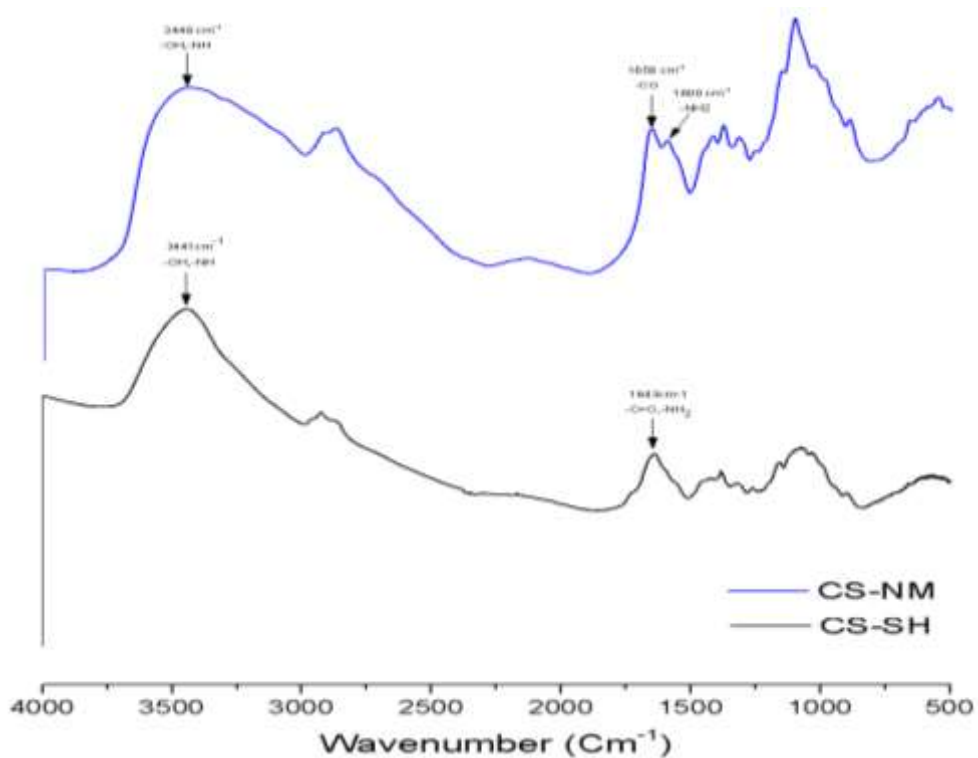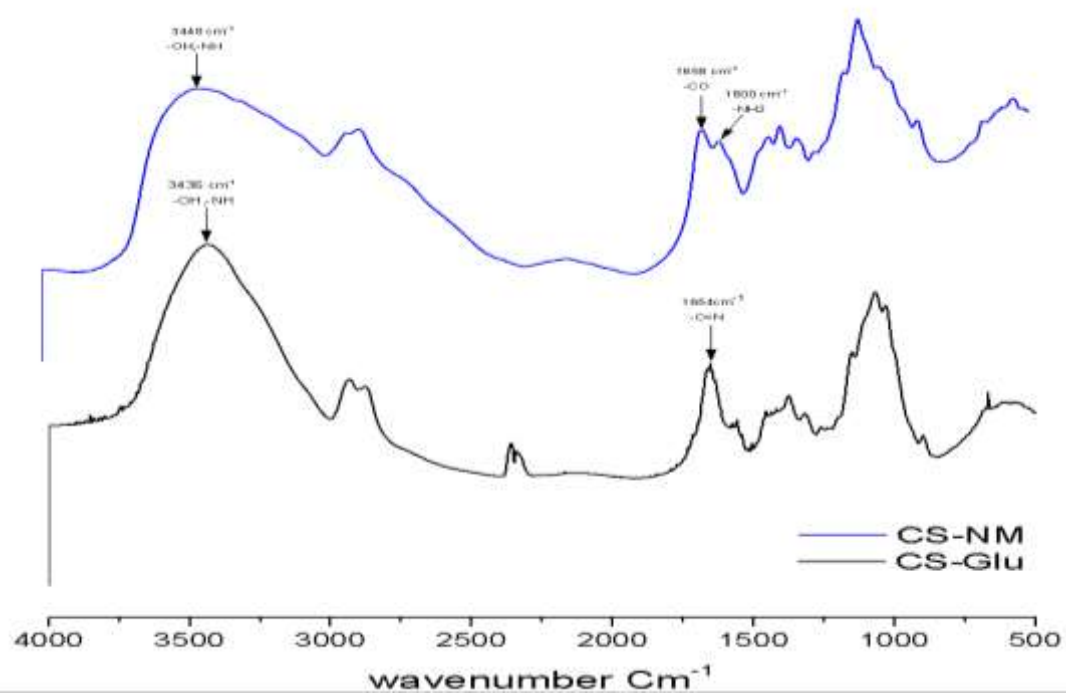

## S4. CP MAS NMR analysis

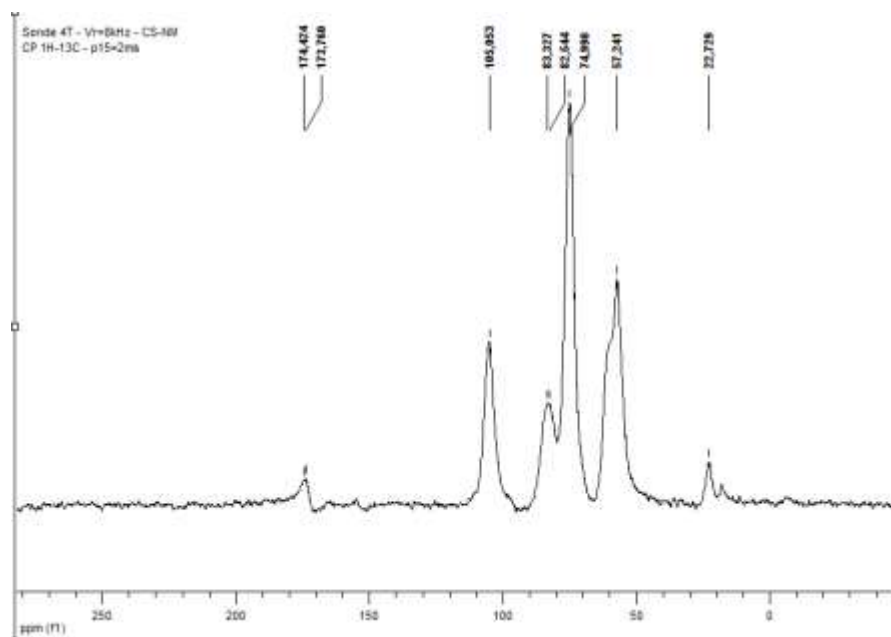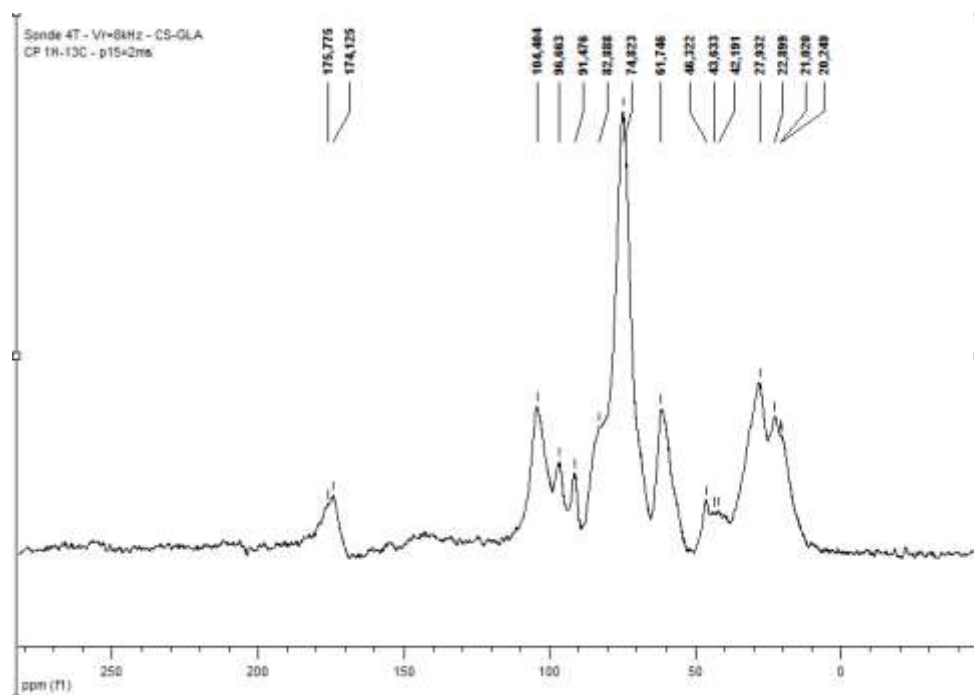

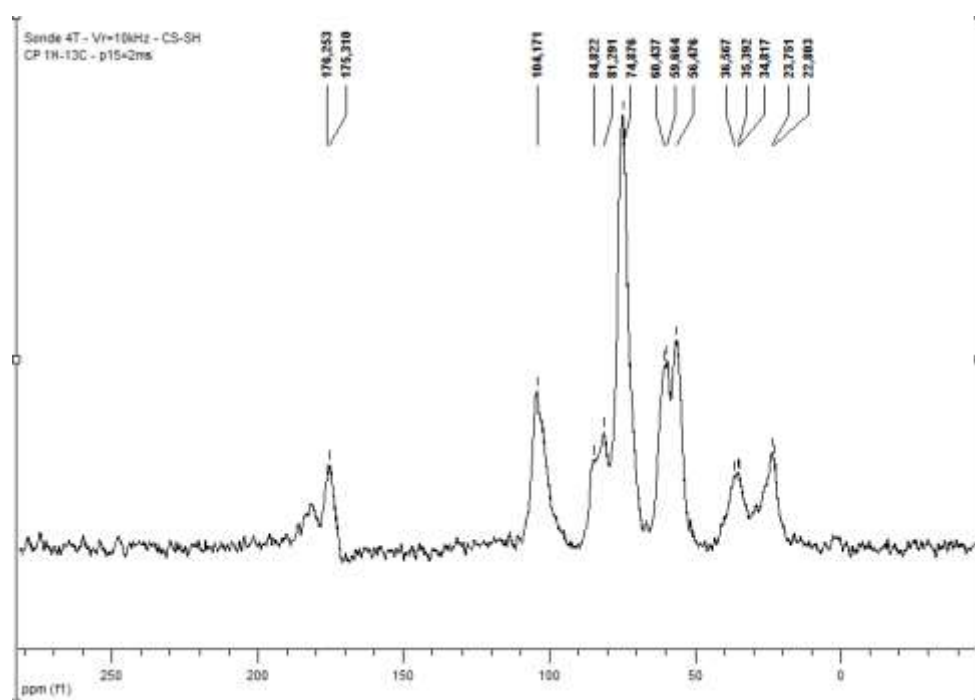

## S5. SEM analysis

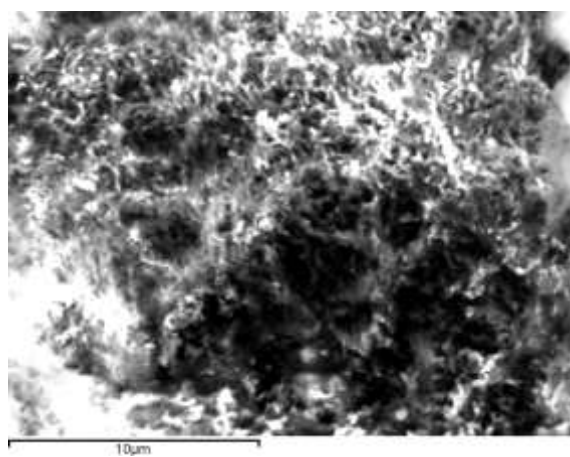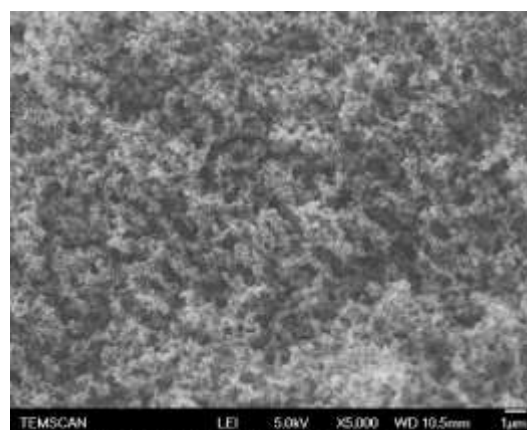

SEM of **Pd-CS** (left) and **Pd-CS-Glu** (right).

## S6. TEM analysis

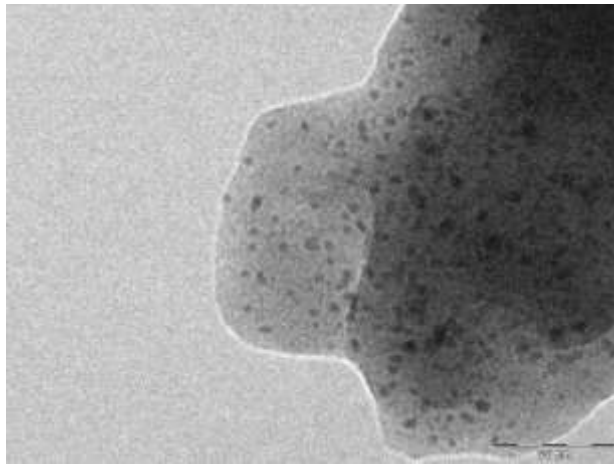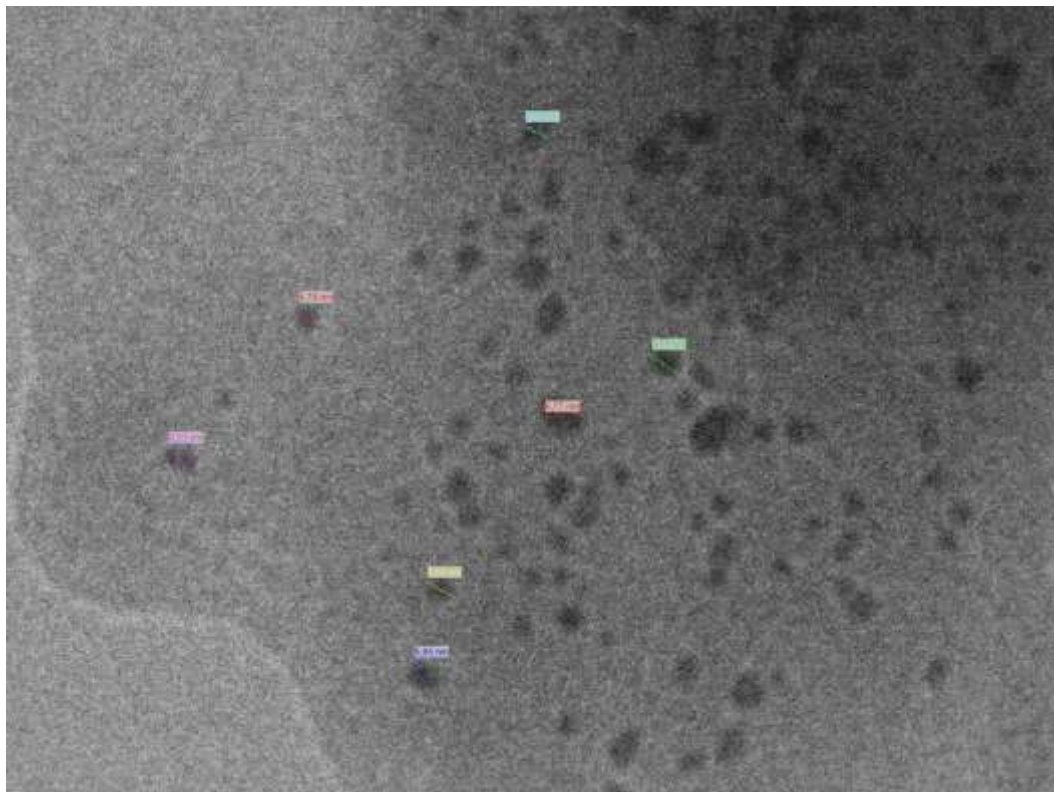

## S7. XPS analysis

### Pd3d (Pd-CS)

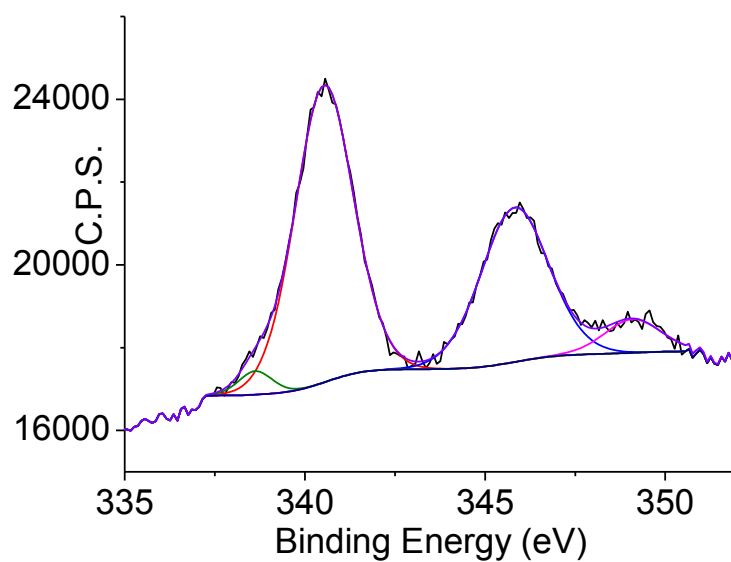

### Pd3d (Pd-CS-Glu)

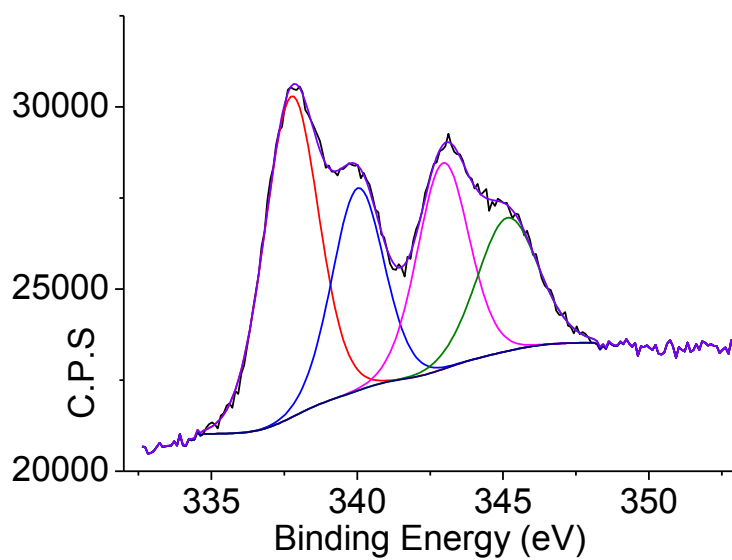

Pd3d (Pd-CS-SH)

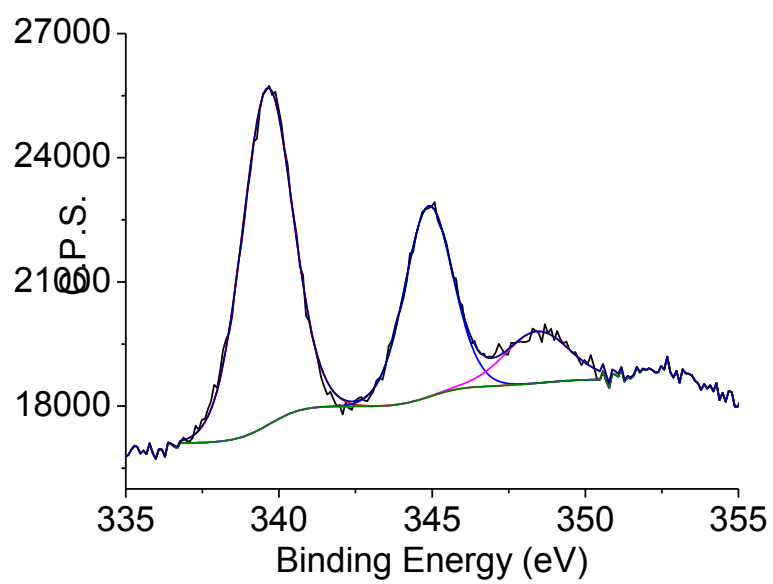

## **S8. Catalysis.**

### **S8a. Typical procedure in catalysis:**

The typical procedure of the Sonogashira reaction employed: (0.054 g, 0.07 mmol) of the supported Pd catalyst, ( 1 mmol , 0.204 g) of aryl halides, phenylacetylene (1.2 mmol , 0.122g) and (3 mmol , 0.414 g)  $K_2CO_3$  in 6 mL water: ethanol mixture [ 1:5 v /v] were mixed in a round flask under nitrogen. The reaction mixture was stirred at 65°C for a fixed time. After a stipulated period, the reaction mixture was filtered. The solvent was evaporated under vacuum and then the product was extracted three times with 15 mL of ethyl ether.

### **S8b. Reusability study of heterogeneous palladium catalysts:**

After completion of the first cycle as described above, the supported Pd on chitosan or modified microspheres were separated from the reaction mixture by simple filtration. The microspheres were rinsed with ethanol and water (necessary to remove salts in the form of excess base) for 3 times and then with ethanol twice. The recycled palladium catalyst was used again in the next run of the cross-coupling reaction under the same reaction conditions (e.g. concentration of reactants) as the first run.

### S8c. Kinetics of the three functional alcogel microspheres.

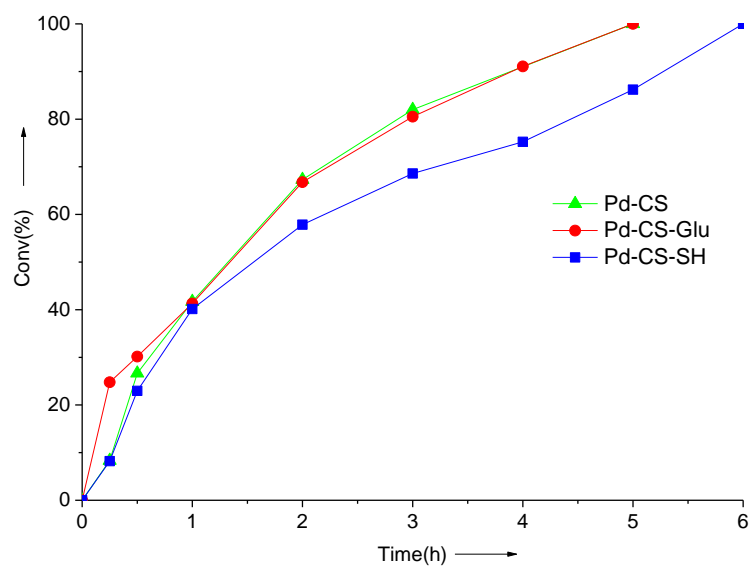

### S8d. Kinetics of the three functional aerogel microspheres.

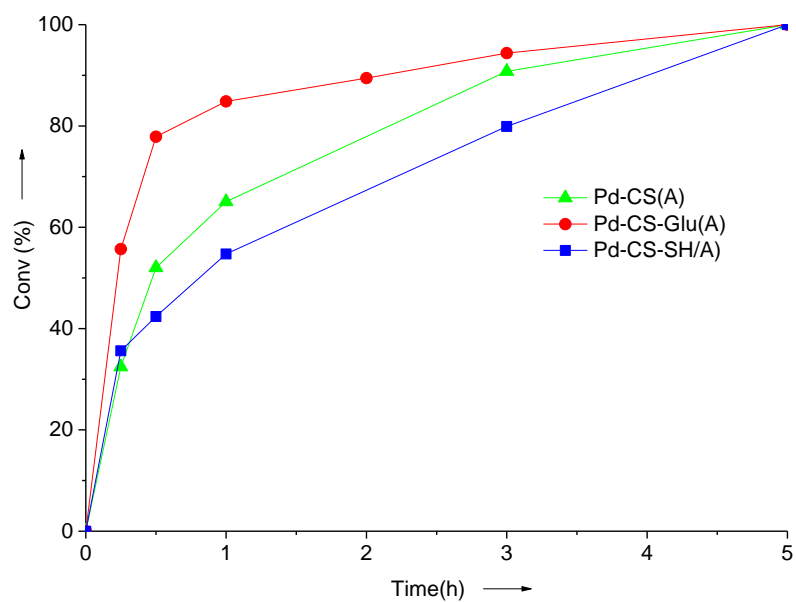

## S9. XPS before and after catalysis

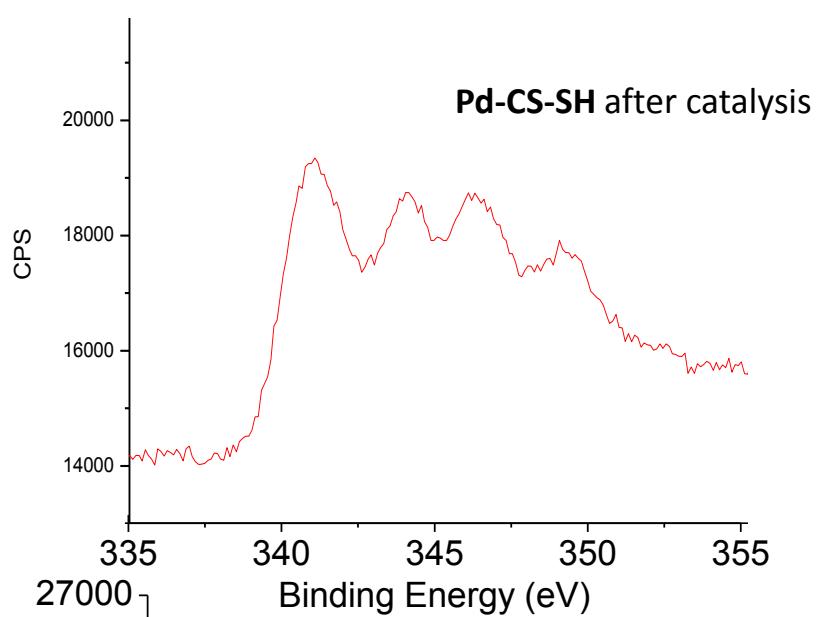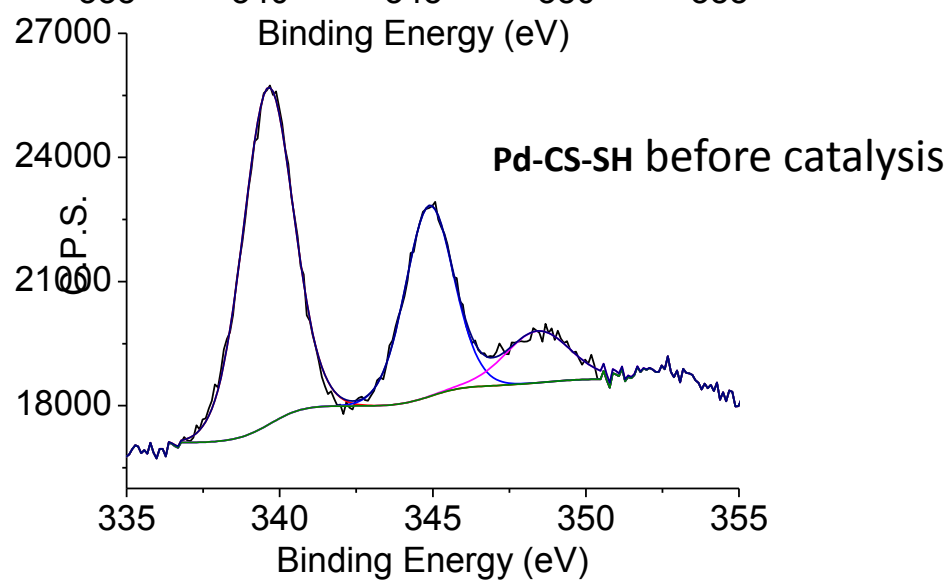

# S10. NMR spectra of some substrates.

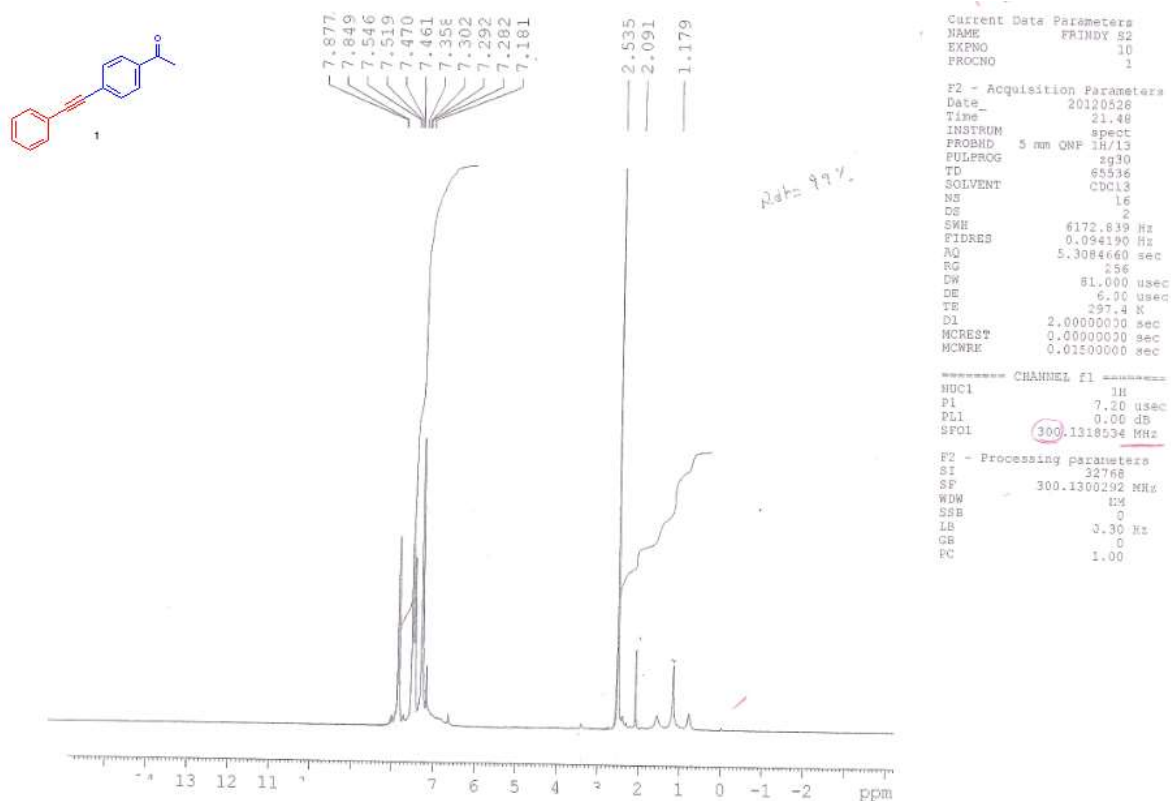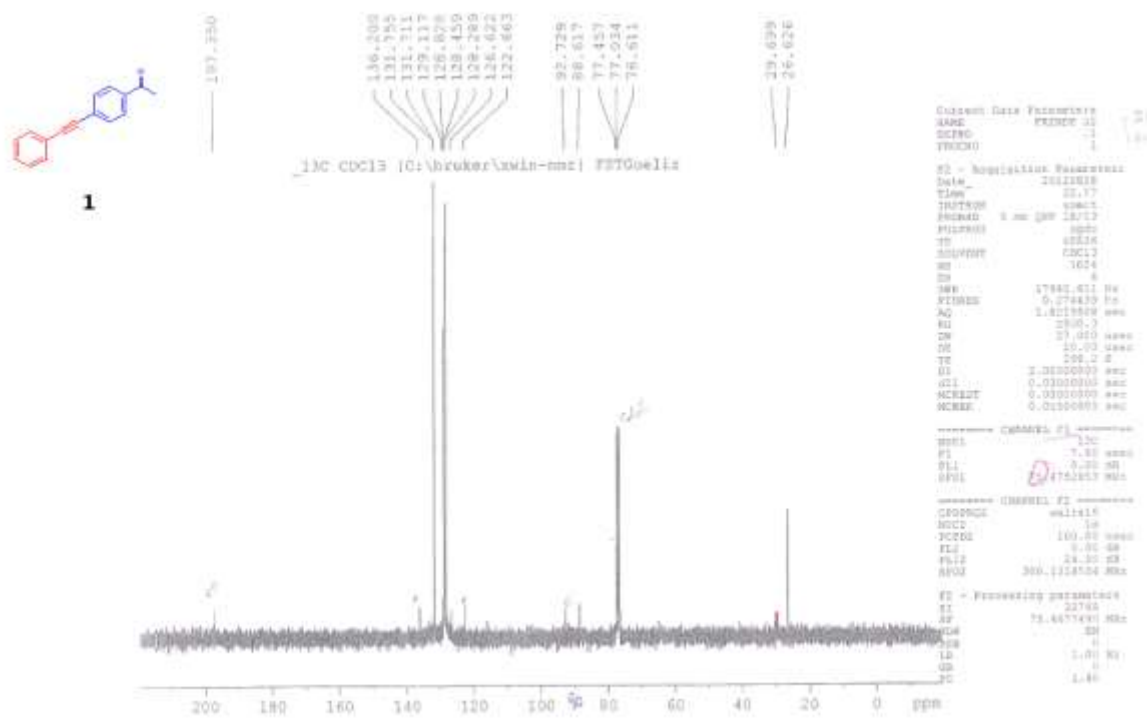

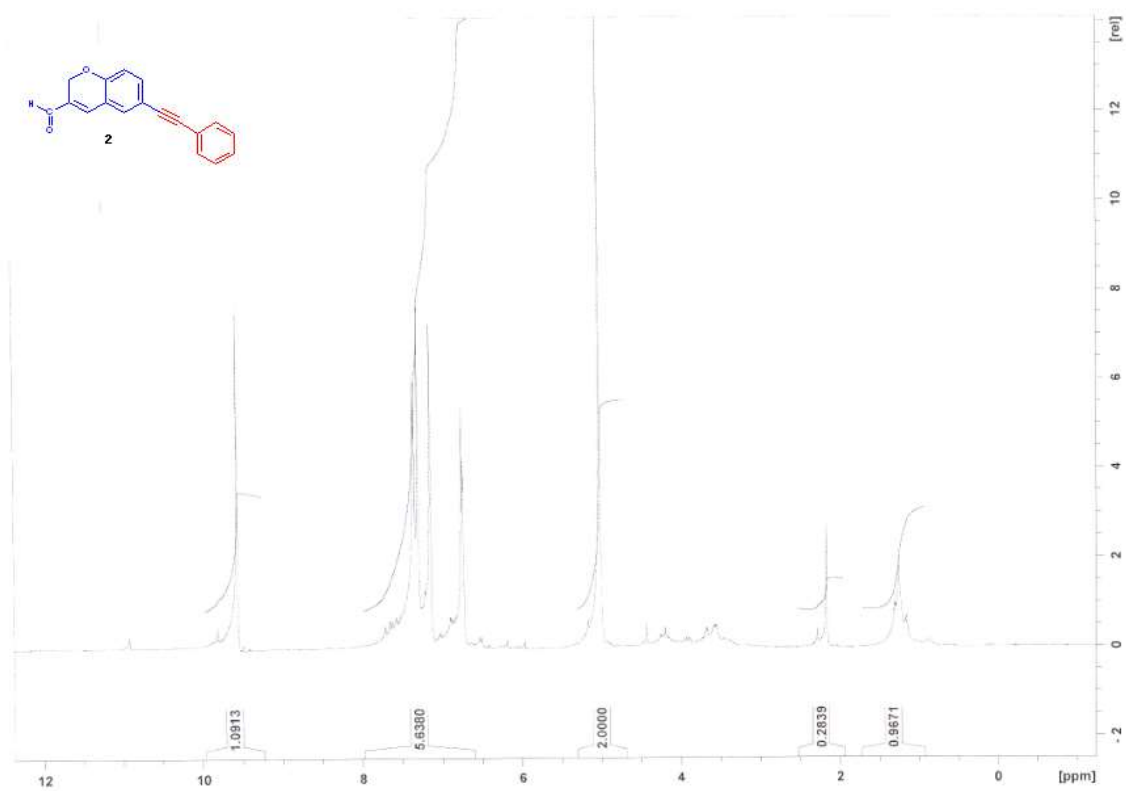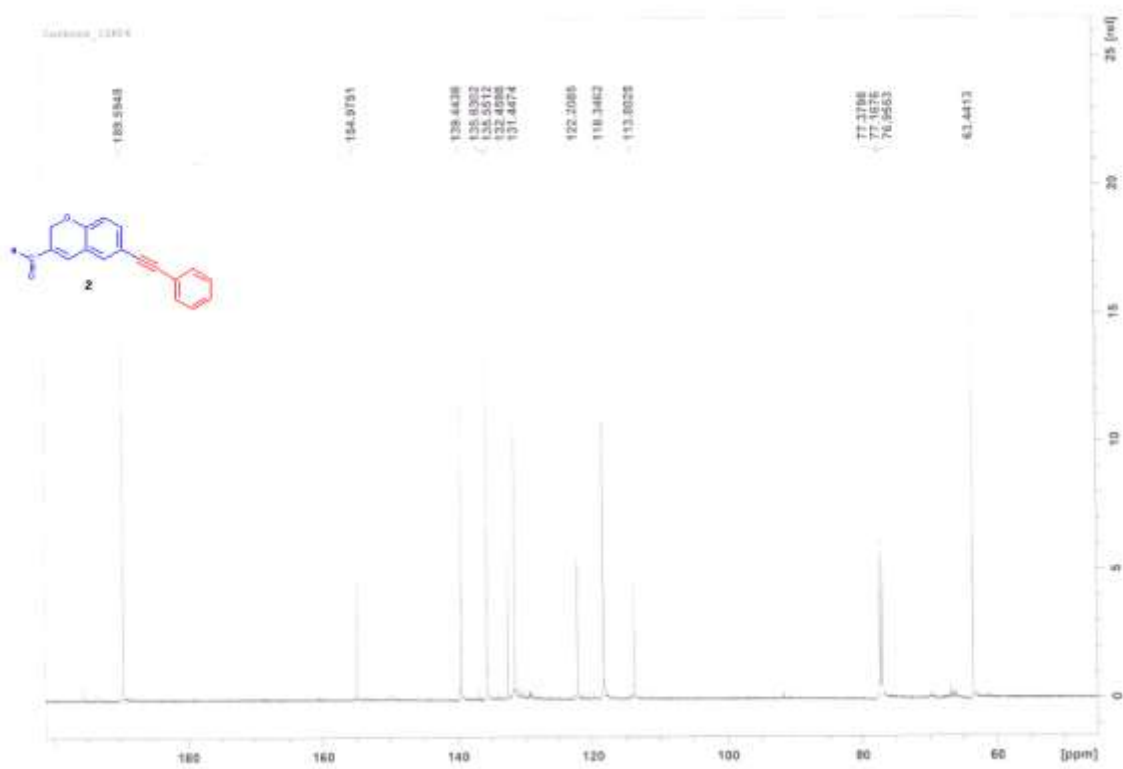

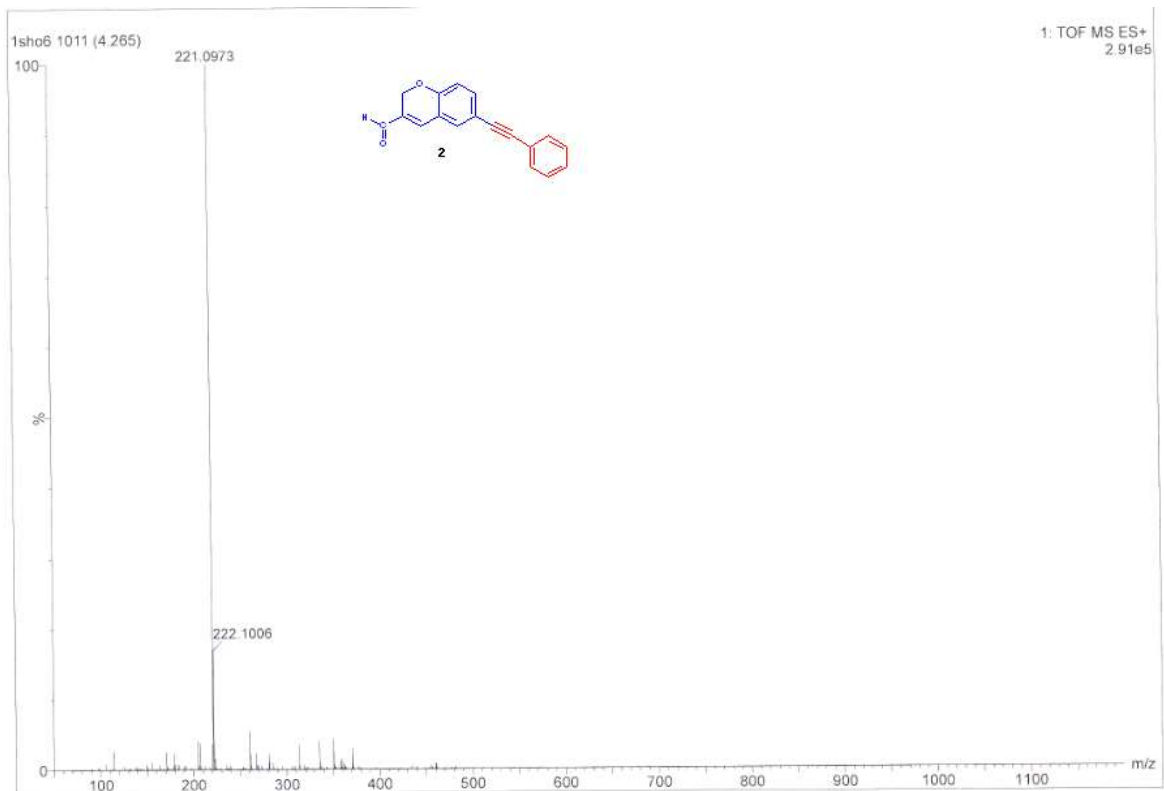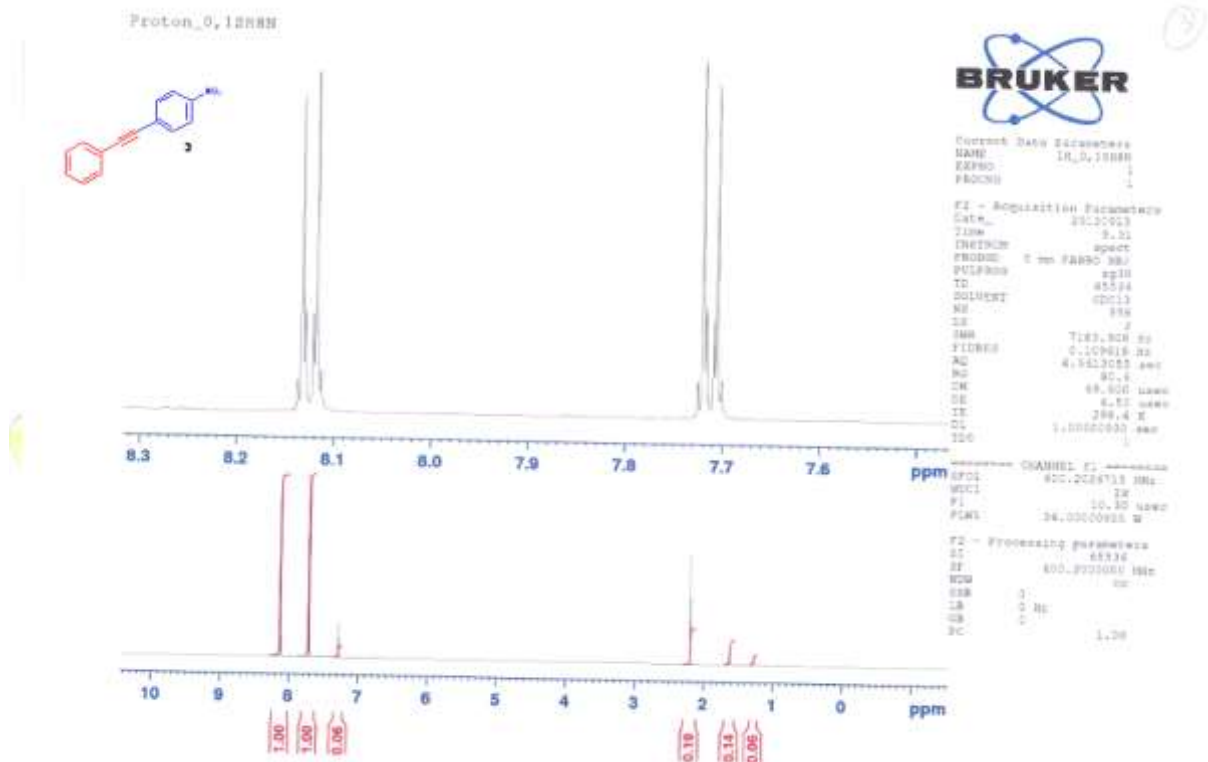

Carbone\_0,1SH8N

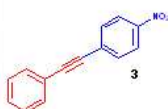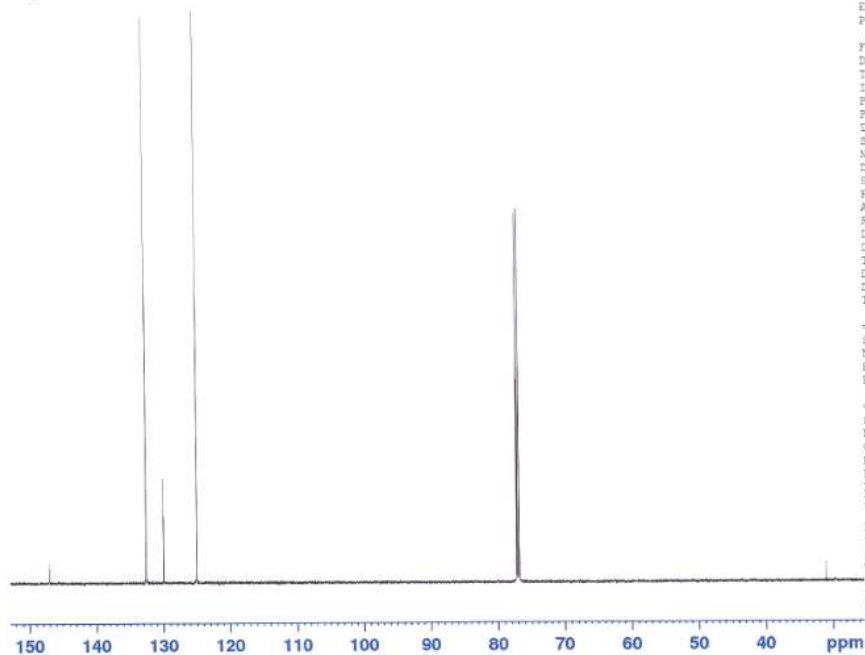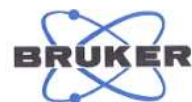

Current Data Parameters  
NAME 13C\_0,1SH8N  
EXPNO 1  
PROCNO 1

F2 - Acquisition Parameters  
Date\_ 20130912  
Time 14.26  
INSTRUM spect  
PROBHD 5 mm PABBO BB/  
PULPROG zgpg30  
TD 65536  
SOLVENT CDCl3  
NS 493  
DS 4  
SWH 36057.691 Hz  
FIDRES 0.550197 Hz  
AQ 0.9087859 sec  
RG 2050  
DW 13.867 usec  
DE 6.50 usec  
TE 300.0 K  
D1 2.00000000 sec  
D11 0.03000000 sec  
ID0 1

===== CHANNEL f1 =====  
SF01 150.9333014 MHz  
NUC1 13C  
P1 11.80 usec  
PLW1 90.00000000 W

===== CHANNEL f2 =====  
SF02 600.2024008 MHz  
NUC2 1H  
CPDPRG2 waltz16  
PCPD2 70.00 usec  
PLW2 36.00000000 W  
PLW12 0.77943999 W  
PLW13 0.38192001 W

F2 - Processing parameters  
SI 32768  
SF 150.9204100 MHz  
WDW EM  
SSB 0  
LB 1.00 Hz  
GB 0  
PC 1.40

Proton\_1SHS20

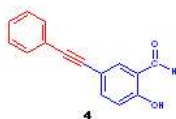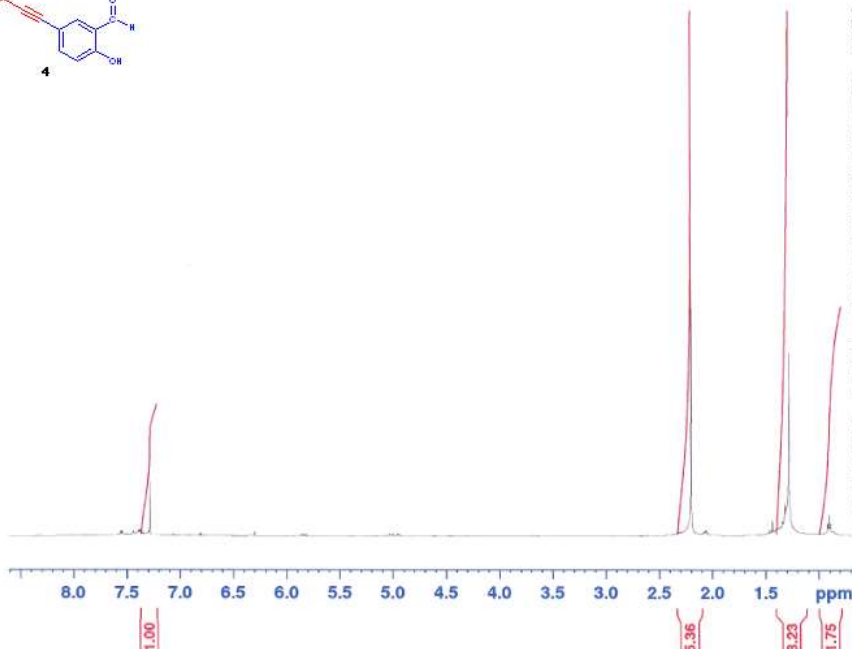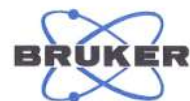

Current Data Parameters  
NAME 1H\_1SHS20  
EXPNO 1  
PROCNO 1

F2 - Acquisition Parameters  
Date\_ 20130913  
Time 10.04  
INSTRUM spect  
PROBHD 5 mm PABBO BB/  
PULPROG zg30  
TD 65536  
SOLVENT CDCl3  
NS 373  
DS 2  
SWH 7246.377 Hz  
FIDRES 0.110571 Hz  
AQ 4.5219841 sec  
RG 80.6  
DW 69.000 usec  
DE 6.50 usec  
TE 298.4 K  
D1 1.00000000 sec  
ID0 1

===== CHANNEL f1 =====  
SF01 600.2026289 MHz  
NUC1 1H  
P1 10.30 usec  
PLW1 36.00000000 W

F2 - Processing parameters  
SI 65536  
SF 600.2000000 MHz  
WDW no  
SSB 0  
LB 0 Hz  
GB 0  
PC 1.00

Proton\_1SHS20

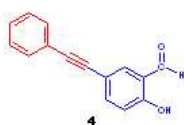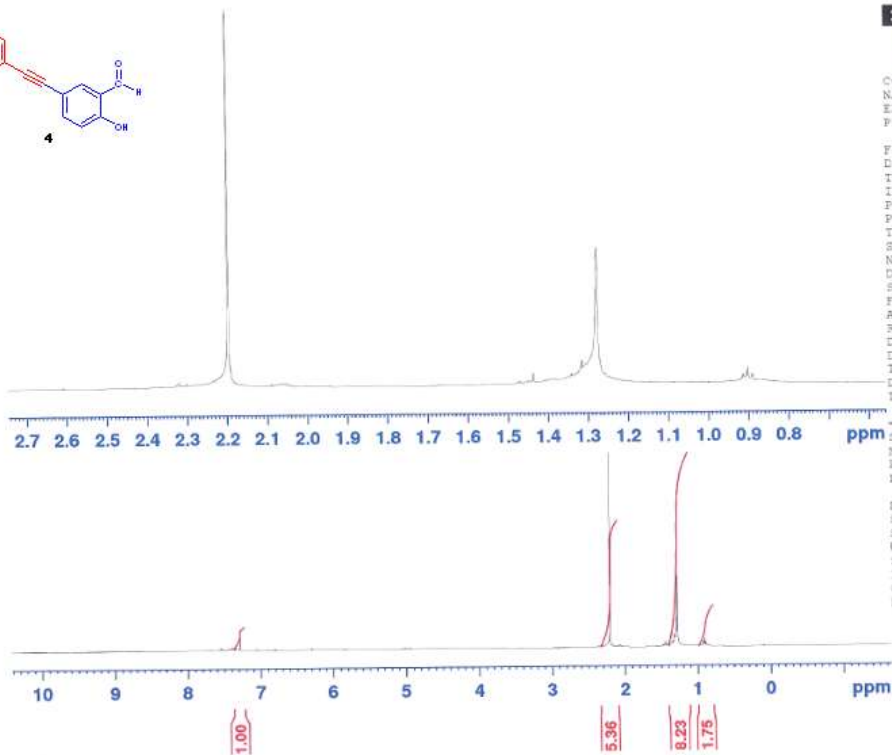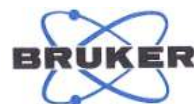

Current Data Parameters  
 NAME 1H\_1SHS20  
 EXPNO 1  
 PROCNO 1  
 F2 - Acquisition Parameters  
 Date\_ 20130913  
 Time 10.04  
 INSTRUM spect  
 PROBHD 5 mm FAPBO BB/  
 PULPROG zg30  
 TD 65536  
 SOLVENT CDCl3  
 NS 373  
 DS 2  
 SWH 7246.377 Hz  
 FIDRES 0.110571 Hz  
 AQ 4.5219941 sec  
 RG 80.6  
 DW 59.000 usec  
 DE 6.50 usec  
 TE 298.4 K  
 D1 1.00000000 sec  
 D11 1  
 D12 1

CHANNEL f1  
 SFO1 600.2026289 MHz  
 NUC1 1H  
 P1 10.30 usec  
 PLW1 36.00000000 W  
 F2 - Processing parameters  
 SI 65536  
 SF 600.2000000 MHz  
 WDW no  
 SSB 0  
 LB 0 Hz  
 GB 0  
 PC 1.00

Carbone\_1SHS20

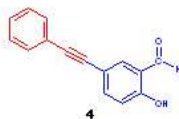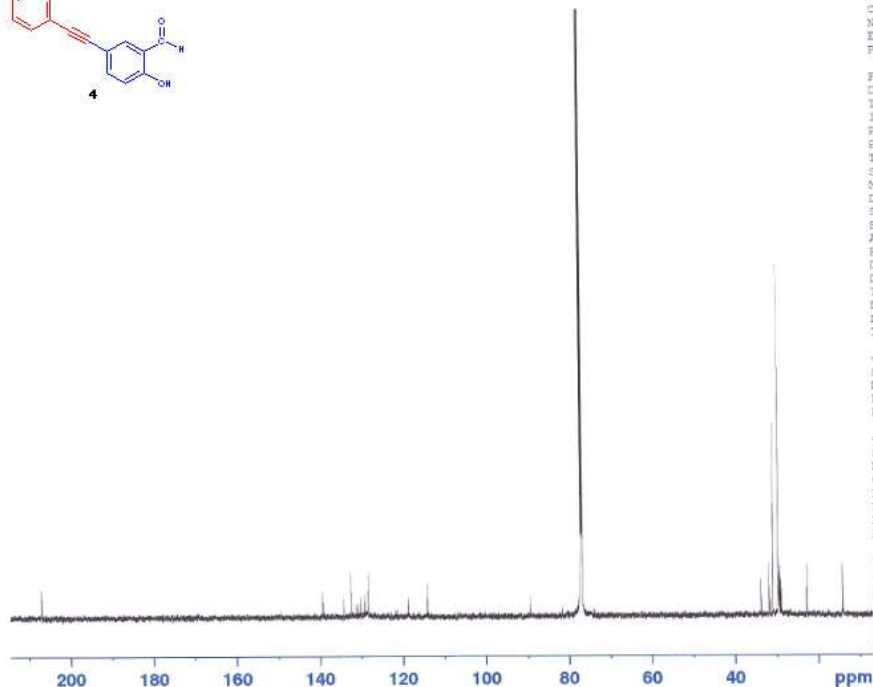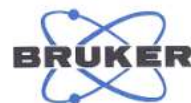

Current Data Parameters  
 NAME 13C\_1SHS20  
 EXPNO 1  
 PROCNO 1  
 F2 - Acquisition Parameters  
 Date\_ 20130916  
 Time 8.00  
 INSTRUM spect  
 PROBHD 5 mm FAPBO BB/  
 PULPROG zgpg30  
 TD 65536  
 SOLVENT CDCl3  
 NS 3154  
 DS 4  
 SWH 36057.691 Hz  
 FIDRES 0.550197 Hz  
 AQ 0.9087659 sec  
 RG 2030  
 DW 13.867 usec  
 DE 6.50 usec  
 TE 302.9 K  
 D1 2.00000000 sec  
 D11 0.03000000 sec  
 D12 1  
 D13 1

CHANNEL f1  
 SFO1 150.9355014 MHz  
 NUC1 13C  
 P1 11.80 usec  
 PLW1 90.00000000 W  
 CHANNEL f2  
 SFO2 600.2024008 MHz  
 NUC2 1H  
 CPDPRG2 waltz16  
 PCPD2 70.00 usec  
 PLW2 36.00000000 W  
 PLW12 0.77943999 W  
 PLW13 0.38192601 W

F2 - Processing parameters  
 SI 32768  
 SF 150.9204100 MHz  
 WDW EM  
 SSB 0  
 LB 2.00 Hz  
 GB 0  
 PC 1.40



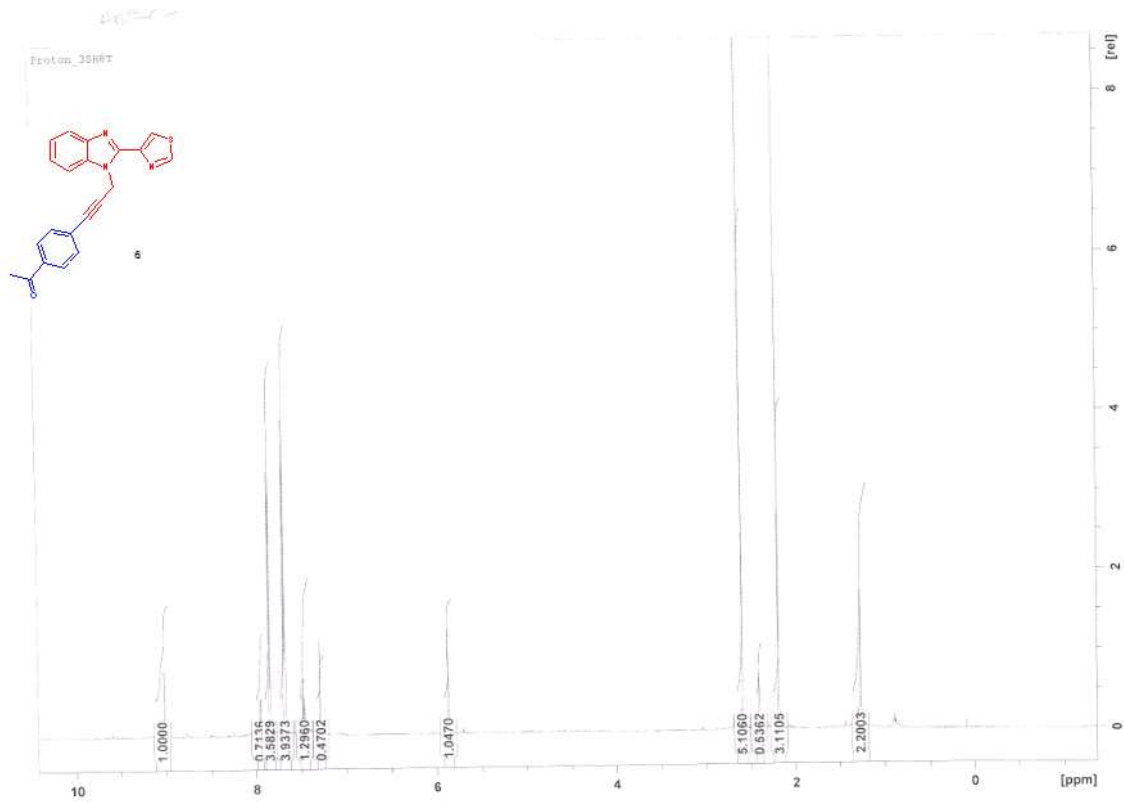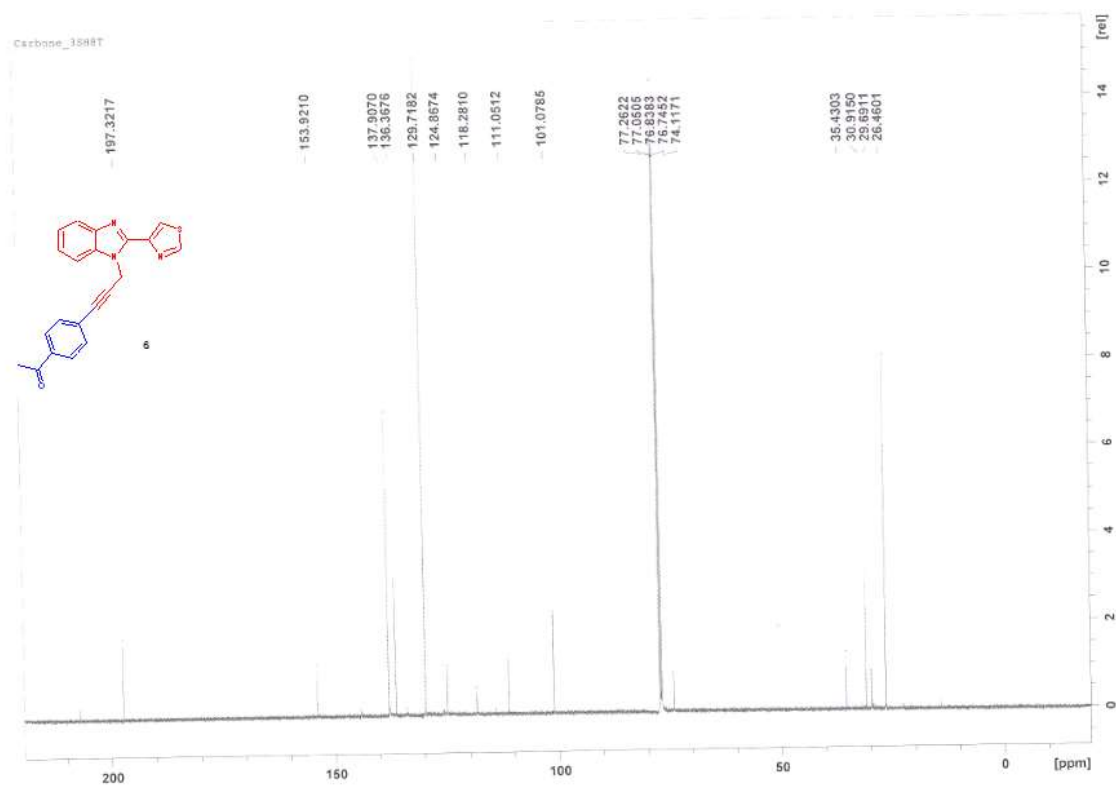

Supplement: c4gc02175d1.pdf [file c4gc02175d1.pdf]
